# Supplementary material
Source: MDPI journal article supplement (https://www.mdpi.com/2073-4441/8/12/574)
Supplement: s2 [file s2]

## Sheet: survey
type	name	label	hint	default	appearance	constraint	constraint message	relevance	disabled	required	required message	read only	calculation	repeat_count	media:image	media:audio	media:video	choice_filter	note	response_note	publishable
start	starttime
end	endtime
deviceid	deviceid
subscriberid	subscriberid
simserial	simid
phonenumber	devicephonenum
begin group	groupz	Survey ID information			field-list
select_one communityid	communityid	Community								yes											yes
text	enumerator	Survey Collector [WRITE YOUR NAME HERE]								yes											yes
text	hhid	Household ID [automatic]								yes			once(uuid())								yes
end group	groupz
begin group	groupa	Introduction and consent			field-list
note	intronote	Introduce yourself and explain where you are from and why you are here. Explain that the survey will only take roughly 45 minutes to complete. Ask permission to conduct the survey.
select_one yesno	consent	A) Are you willing to participate in this survey?									An answer is required.										yes
end group	groupa
begin group	consented	Household Survey Module						${consent}=2											Group only displays to those who provide consent.
begin group	groupb	Research consent			field-list
note	researchnote	We are interested in the impact of climate change on Pacific Island Countries, especially those relating to water. Our research aims to find out how to include climate change impacts in planning and policy around water, and how local management can be helped to ensure sustainable clean water for everyone, now and in the future. As a participant you will be asked to provide your own opinions on wa…
select_one yesno	researchconsent	2. Do you consent to the information you provide today being used for this research project?								yes	An answer is required.										yes
end group	groupb
image	researchsig	B) Please sign or make a mark here to show your consent.			signature			${researchconsent}=2		yes											yes
text	hhname	C) Please provide your name
integer	hhage	D) How old are you?				.>17				yes	An answer is required
begin group	groupf	Household demographics			field-list
integer	hhnumbers	E) How many people, including yourself, currently live in this house?								yes	An answer is required.										yes
integer	hhnumbersfemch	ii) Children (0-15)?																			yes
integer	hhnumbersfemsen	iv) Seniors (65+)?																			yes
integer	hhnumbersmale	vii) Adults (16-64)?																			yes
end group	groupf
begin group	groupg	Household water sources			field-list
select_multiple watersource	watersource	1. Which of the following water sources are used by your household (select all that apply):					compact			yes
end group	groupg
text	watersource_otherspecify	1. b) Please specify "other" water source:						selected(${watersource}, '95')
select_multiple access_method	access_method_publicwell	1. c)How do you access water from the public well?						selected(${watersource}, '4')
select_multiple access_method	access_method_privatewell	1. d)How do you access water from the private well?						selected(${watersource}, '3')
select_one roof_type	roof_type_public	1. e) What is the roof (or catchment) made of for the public rainwater harvesting system?						selected(${watersource}, '2')
select_one roof_type	roof_type_private	1. f) What is the roof (or catchment) made of for the private rainwater harvesting system?						selected(${watersource}, '1')
select_one taps_source	taps_source	1. g)What is the source of the water that is distirubuted by public taps?						selected(${watersource}, '5')
calculate	watersource_count												count-selected(${watersource})
begin repeat	grouph_usage	Household water usage												${watersource_count}
calculate	watersource_type												jr:choice-name(selected-at(${watersource}, position(..)-1), '${watersource}')
begin group	group_usage_questions				field-list
select_multiple hhmembers	hhmembers	2. Who from your household collects water from ${watersource_type}?					compact			yes
integer	waterwalktime	3. How far away is the nearest ${watersource_type}? (Minutes of ONEWAY walking time)								yes											yes
select_multiple watertreat	base_watertreat	4. Do you ever treat your drinking water from ${watersource_type} using:					compact			yes
select_multiple waterstorage	base_waterstorage	5. Do you store drinking water from ${watersource_type} using any of the following?:					compact			yes
select_one watercost	watercost	6. How much does your household pay for water from ${watersource_type}?					compact			yes
select_one watersafety	base_watersafety	7. How would you judge the safety of the water from ${watersource_type} BEFORE any treatment?					compact			yes
select_multiple contamination	base_contamination	9. Has ${watersource_type} ever been unsuitable to drink because of: (record all that apply)					compact			yes
end group	group_usage_questions
begin group	group_specify_other				field-list
text	hhmembers_otherspecify	2. b)Please specify "other" for who collects household water:						selected(${hhmembers}, '95')
text	watertreat_otherspecify	4. b) Please specify "other" for method of treating household drinking water:						selected(${base_watertreat}, '95')
text	waterstorage_otherspecify	5. b) Please specify what is meant by "other" method for storing household drinking water:						selected(${base_waterstorage}, '95')
text	watercost_otherspecify	6. b) Please specify what is meant by "other" for the cost of water:						selected(${watercost}, '95')
text	contamination_otherspecify	9. b) Please specify what is meant by "other" sources of contamination:						selected(${base_contamination}, '95')
end group	group_specify_other
end repeat	grouph_usage
begin repeat	group_baseline_usage	Baseline water usage												${watersource_count}
calculate	watersource_type2												jr:choice-name(selected-at(${watersource}, position(..)-1), '${watersource}')
begin group	wateruse_baseline				field-list
select_one usagetype	wet_usagetype_label	10. Do you use water from ${watersource_type2} for any of the following activities during the RAINY season? (record all that apply)			label
select_one usagetype	wet_drink_usage	Drinking			list-nolabel					yes
select_one usagetype	wet_cook_usage	Cooking			list-nolabel					yes
select_one usagetype	wet_bath_usage	Bathing			list-nolabel					yes
select_one usagetype	wet_handwash_usage	Washing Hands			list-nolabel					yes
select_one usagetype	wet_clotheswash_usage	Washing Clothes			list-nolabel					yes
select_one usagetype	wet_animals_usage	Animals			list-nolabel					yes
select_one usagetype	wet_farm_usage	Farming/gardens			list-nolabel					yes
select_one usagetype	wet_share_usage	Share with neighbours			list-nolabel					yes
select_one usagetype	wet_other_usage	Other (specify after this question)			list-nolabel					yes
end group	wateruse_baseline
text	wet_wateruse_otherspecify	10. a) Please specify "other" water use:						${wet_other_usage} != '4'
select_one yesno	season_waterusage_diff	11. Is there a difference in how you use water from ${watersource_type2} between the wet and the dry season?								yes
begin group	season_water_diff							${season_waterusage_diff}='2'
begin group	Dry_wateruse				field-list
select_one usagetype	dry_usagetype_label	12. Do you use water from ${watersource_type2} for any of the following activities during the DRY season? (record all that apply)			label
select_one usagetype	dry_drink_usage	Drinking			list-nolabel					yes
select_one usagetype	dry_cook_usage	Cooking			list-nolabel					yes
select_one usagetype	dry_bath_usage	Bathing			list-nolabel					yes
select_one usagetype	dry_handwash_usage	Washing Hands			list-nolabel					yes
select_one usagetype	dry_clotheswash_usage	Washing Clothes			list-nolabel					yes
select_one usagetype	dry_animals_usage	Animals			list-nolabel					yes
select_one usagetype	dry_farm_usage	Farming/gardens			list-nolabel					yes
select_one usagetype	dry_share_usage	Share with neighbours			list-nolabel					yes
select_one usagetype	dry_other_usage	Other (specify after this question)			list-nolabel					yes
end group	Dry_wateruse
text	dry_wateruse_otherspecify	12. a) Please specify "other" water use:						${dry_other_usage} != '4'
end group	season_water_diff
end repeat	group_baseline_usage
begin group	groupc	Confirmation of drought
select_one yesno	drought	13.Have you ever experienced drought?								yes
end group	groupc
begin repeat	groupi_drought	Drought related questions						${drought}=2						${watersource_count}
calculate	watersource_type3												jr:choice-name(selected-at(${watersource}, position(..)-1), '${watersource}')
begin group	wateruse_drought				field-list
select_one usagetype	drought_usagetype_label	14. During times of DROUGHT, for which of the following do you use water from ${watersource_type3} and where is the water used?			label
select_one usagetype	drought_drink_usage	Drinking			list-nolabel					yes
select_one usagetype	drought_cook_usage	Cooking			list-nolabel					yes
select_one usagetype	drought_bath_usage	Bathing			list-nolabel					yes
select_one usagetype	drought_handwash_usage	Washing Hands			list-nolabel					yes
select_one usagetype	drought_clotheswash_usage	Washing Clothes			list-nolabel					yes
select_one usagetype	drought_animals_usage	Animals			list-nolabel					yes
select_one usagetype	drought_farm_usage	Farming/gardens			list-nolabel					yes
select_one usagetype	drought_share_usage	Share with neighbours			list-nolabel					yes
select_one usagetype	drought_other_usage	Other (specify after this question)			list-nolabel					yes
end group	wateruse_drought
text	drought_wateruse_otherspecify	14. a) Please specify "other" water use:						${drought_other_usage} != '4'
begin group	groupi_drought_otherqs				field-list
select_one watersafety	drought_watersafety	15. During times of DROUGHT how would you judge the safety of the water from ${watersource_type3} BEFORE any treatment?					compact			yes
select_one waterreliable	drought_waterreliable	16. During times of DROUGHT how would you judge the reliability of your water from ${watersource_type3}?					compact			yes
integer	monthsdry	17. If the ${watersource_type3} ever went dry, how long was it dry for? [Number of MONTHS without water]								yes
end group	groupi_drought_otherqs
end repeat	groupi_drought
begin group	groupd	Confirmation of flood
select_one yesno	flood	18. Have you ever experienced flooding?								yes
end group	groupd
select_one flooding_type	flood_type	19. What is the most common form of flooding experienced by your community?						${flood}='2'
begin repeat	groupj_flood	Flood related questions						${flood}=2						${watersource_count}
calculate	watersource_type4												jr:choice-name(selected-at(${watersource}, position(..)-1), '${watersource}')
begin group	wateruse_flood				field-list
select_one usagetype	flood_usagetype_label	20. When there is FLOODING, which of the following do you use water from ${watersource_type4} and where is the water used?			label
select_one usagetype	flood_drink_usage	Drinking			list-nolabel					yes
select_one usagetype	flood_cook_usage	Cooking			list-nolabel					yes
select_one usagetype	flood_bath_usage	Bathing			list-nolabel					yes
select_one usagetype	flood_handwash_usage	Washing Hands			list-nolabel					yes
select_one usagetype	flood_clotheswash_usage	Washing Clothes			list-nolabel					yes
select_one usagetype	flood_animals_usage	Animals			list-nolabel					yes
select_one usagetype	flood_farm_usage	Farming/gardens			list-nolabel					yes
select_one usagetype	flood_share_usage	Share with neighbours			list-nolabel					yes
select_one usagetype	flood_other_usage	Other (specify after this question)			list-nolabel					yes
end group	wateruse_flood
text	flood_wateruse_otherspecify	20. a) Please specify "other" water use:						${flood_other_usage} != '4'
begin group	groupj_flood_otherqs				field-list
select_one watersafety	flood_watersafety	21. When there is FLOODING how would you judge the safety of the water from ${watersource_type4} BEFORE any treatment?					compact			yes
select_multiple contamination	flood_contamination	21. b) Has ${watersource_type4} ever been unsuitable to drink because of: (record all that apply)					compact			yes
select_multiple watertreat	flood_watertreat	22. When there is FLOODING do you ever treat water from the ${watersource_type4} using any of the following:					compact			yes
select_one waterreliable	flood_waterreliable	23. When there is FLOODING how would you judge the reliability of your water from ${watersource_type4}?					compact			yes
end group	groupj_flood_otherqs
text	flood_watertreat_otherspecify	22. a) Please specify what is meant by "other" treatment option:						selected(${flood_watertreat},'95')
text	flood_contamination_other	21. c) Please specify "other" reason for why water was unsuitable to drink:						selected(${flood_contamination},'95')
end repeat	groupj_flood
begin group	groupe	Confirmation of cyclone
select_one yesno	cyclone	24.Have you ever experienced a cyclone/typhoon?								yes
end group	groupe
begin repeat	groupk_cyclone	Cyclone related questions						${cyclone}=2						${watersource_count}
calculate	watersource_type5												jr:choice-name(selected-at(${watersource}, position(..)-1), '${watersource}')
begin group	wateruse_cyclone				field-list
select_one usagetype	cyclone_usagetype_label	25. After a CYCLONE, which of the following do you use water from ${watersource_type5} and where is the water used?			label
select_one usagetype	cyclone_drink_usage	Drinking			list-nolabel					yes
select_one usagetype	cyclone_cook_usage	Cooking			list-nolabel					yes
select_one usagetype	cyclone_bath_usage	Bathing			list-nolabel					yes
select_one usagetype	cyclone_handwash_usage	Washing Hands			list-nolabel					yes
select_one usagetype	cyclone_clotheswash_usage	Washing Clothes			list-nolabel					yes
select_one usagetype	cyclone_animals_usage	Animals			list-nolabel					yes
select_one usagetype	cyclone_farm_usage	Farming/gardens			list-nolabel					yes
select_one usagetype	cyclone_share_usage	Share with neighbours			list-nolabel					yes
select_one usagetype	cyclone_other_usage	Other (specify after this question)			list-nolabel					yes
end group	wateruse_cyclone
text	cyclone_wateruse_otherspecify	25. b) Please specify "other" water uses:						${cyclone_other_usage} != '4'
begin group	groupk_cyclone_otherqs				field-list
select_one watersafety	cyclone_watersafety	26. After a CYCLONE how would you judge the safety of the water from ${watersource_type5} BEFORE any treatment?					compact			yes
select_one waterreliable	cyclone_waterreliable	27. After a CYCLONE how would you judge the reliability of your water from ${watersource_type5}?					compact			yes
select_multiple watertreat	cyclone_watertreat	28. After a CYCLONE do you ever treat water from the ${watersource_type5} using any of the following?					compact			yes
end group	groupk_cyclone_otherqs
text	cyclone_watertreat_otherspecify	28. b) Please specify what is meant by "other" method of water treatment.						selected(${cyclone_watertreat} , '95')
end repeat	groupk_cyclone
begin group	groupl				field-list
select_multiple months	months	29. In which months of the year do you receive the most rain? (record all that apply)					compact			yes
select_one rwh_runout	rwh_runout	30. In a typical year, when does your rainwater storage usually run out? (record all that apply)								yes
integer	raintank_size	31. What is the volume of your rainwater storage tank?
select_one volume_unit	raintank_unit	Please specify the volume units:
select_one yesno	emerg_source	32. Do you have a water source that is used only in emergencies (in addition to those already mentioned) or a protected water source?					compact			yes
end group	groupl
begin group	e_water_src							${emerg_source}='2'
select_multiple emergencysource	other_emerg_sources	32. b) What is you emergency water source?								yes
end group	e_water_src
begin group	emergency_source				field-list			${emerg_source}='2' and ${other_emerg_sources}!='4'
integer	hhemergsource	33. How many households use this emergency/protected water source?								yes
select_one yesno	waterlast	34. Does your emergency/protected water source have enough water to last your family (and those other users) the entire length of the dry season?								yes
select_multiple protectsource	protectsource	35. Do you do anything to protect the quality of your emergency/protected water source? (record all that apply)					compact			yes
select_multiple wateruse	emerg_wateruse	36. What activities are reserved for the emergency water source? (record all that apply)					compact			yes
end group	emergency_source
text	protectsource_other	Please specify "other" method for protecting the quality of your emergency water source:						selected(${protectsource},'95')
text	emerg_wateruse_other	Please speciy "other" activity reserved for emergency water source:						selected(${emerg_wateruse},'95')
begin group	water_find
select_one yesno	leavehome	37. Have you ever had to leave your home village/district to find water?								yes
select_one yesno	leaveisland	38. Have you ever had to leave your home island to find water?					compact			yes
end group	water_find
integer	times_leavehome	37. a)For how many natural disasters were you required to leave home to find water?						${leavehome}='2'
integer	times_leaveisland	38. a)How many times have you had to leave your home island to find water?						${leaveisland}='2'
begin group	conf_RO
select_one yesno	comm_RO	39. Have any households in your community used water treated by reverse osmosis?								yes
end group	conf_RO
begin group	Reverse_Osmosis							${comm_RO}='2'
begin group	RO_module1				field-list
select_one yesno	hh_RO_use	40.Has your household ever used RO treated water?								yes
select_one percent_comm	percent_comm_RO	41. What percentage of households in your community use water treated by reverse osmosis under EMERGENCY conditions?								yes
integer	RO_freq_distribute	42. How many times has RO been provided for your community?								yes
integer	RO_first_received	43. How many years ago did you first receive an RO unit?								yes
integer	RO_duration	44. In general, how many MONTHS does your community get to keep the RO before it is returned to the operator (eg MWSC)?								yes
select_multiple reasonfor_RO	RO_initial_reason	45. Why was RO first introduced in your community? (Record all that apply)								yes
select_multiple reasonfor_RO_now	RO_circumstances	46. Under what circumstances does your community use RO for now? (record all that apply)								yes
select_multiple RO_watersource	RO_watersource	47. Which water source or water sources are treated by RO?								yes
end group	RO_module1
text	RO_initial_reason_other	45. b) Please specify what is meant by "other" reason for why RO was FIRST introduced in your community:						selected(${RO_initial_reason},'95')
text	RO_circumstance_other	46. b) Please specify what is meant by "other" circumstance under which your community uses RO now:						selected(${RO_circumstances},'95')
text	RO_watersource_other	47. b) Please specify what is meant by "other" water source that is treated using RO:						selected(${RO_watersource},'95')
begin group	RO_nouse							${comm_RO}='2'
select_multiple prevent_RO	reason_no_RO	48. Why do some households in your community (and/or your household) NOT use RO treated water?						${percent_comm_RO}!='1'		yes
end group	RO_nouse
text	reason_no_RO_other	48. b) Please specify "other" reason for why RO is NOT used by some households in your community:						selected(${reason_no_RO},'95')
begin group	RO_wellwater							${comm_RO}='2'
select_one yesno	RO_groundwater	49. Has well water (groundwater) ever been treated with RO in your community?								yes
end group	RO_wellwater
begin group	RO_wellwater_drink							${RO_groundwater}='2'
select_one yesnounsure	well_drink	50. Do people drink water from these sources (wells) without treatment using RO?								yes
end group	RO_wellwater_drink
begin group	RO_wellwater_yes							${well_drink}='2'
select_multiple drinkable_well_RO	RO_whytreat_well	51. If it is already drinkable, then why is it treated with RO?								yes
end group	RO_wellwater_yes
text	RO_whytreat_well_other	51. b) Please specify "other" reason for why well water is treated with RO:						selected(${RO_whytreat_well},'95')
select_one yesno	store_RO	52. Do you ever store RO treated water?								yes
begin group	RO_storage_1							${store_RO}='2'
select_multiple circumstance	circumstance_ro	53. When do you store RO treated water								yes
end group	RO_storage_1
text	circumstance_ro_other	53. b) Please specify "other" circumstance under which you store RO treated water:						selected(${circumstance_ro},'95')
calculate	circumstance_count												count-selected(${circumstance_ro})
begin repeat	circumstance_store_ro	Household RO storage												${circumstance_count}
calculate	circumstance_ro_qs												jr:choice-name(selected-at(${circumstance_ro}, position(..)-1), '${circumstance_ro}')
begin group	Group_RO_circumstance_loop				field-list
select_multiple rostorage	RO_storage	54. How do you store RO treated water during ${circumstance_ro_qs}?								yes
select_multiple watersource	RO_watersource_circumstance	55. Which water sources do you treat using RO during ${circumstance_ro_qs}?								yes
end group	Group_RO_circumstance_loop
text	RO_storage_other	54. b) Please specify "other" method of storing RO treated water during ${circumstance_ro_qs}:						selected(${RO_storage},'95')
text	RO_watersource_other	55. b) Please specify which "other" water source is treated with RO during ${circumstance_ro_qs}:						selected(${RO_watersource_circumstance},'95')
end repeat
select_one yesnounsure	RO_rain_available	56. Do you or anyone else from your community ever use RO when rainwater is available?								yes
begin group	RO_RWH				field-list			${RO_rain_available}='2'
select_multiple ROoverRWH	RO_over_RWH	57. Why is RO used when rainwater is available?								yes
end group	RO_RWH
text	RO_over_RWH_other	57. b) Please specify "other" reason for why RO is used when rainwater is available:						selected(${RO_over_RWH},'95')
begin group	RO_usage
select_multiple wateruse	RO_water_uses	58. For what purpose is RO water typically used? (record all that apply)								yes
end group	RO_usage
text	RO_water_uses_other	58. b) Please specify "other" use for RO treated water:						selected(${RO_water_uses},'95')
end group	Reverse_Osmosis
begin group	Sanitation_survey
begin group	group_s_option
select_multiple defecationplace	sanitation_option	59. What forms of sanitation are used by your household? (record all that apply)								yes
end group	group_s_option
text	sanitation_otherspecify	59. b) Please specify "other" sanitation option:						selected(${sanitation_option}, '95')		yes
calculate	sanitation_count												count-selected(${sanitation_option})
begin repeat	sanitation_groupA	Sanitation Info												${sanitation_count}
calculate	sanitation_type												jr:choice-name(selected-at(${sanitation_option}, position(..)-1), '${sanitation_option}')
calculate	sanitation_2_skip												selected-at(${sanitation_option}, position(..)-1)
begin group	Sanitation_1				field-list
select_multiple hhmembers	sanitation_hhmembers	60. Which members of your household usually use the ${sanitation_type} during the RAINY season?								yes
integer	sanit_walktime	61. How far away is the nearest ${sanitation_type}? (minutes of ONEWAY walking time)								yes
select_one yesno	gender_sep_sanit	62. Does the ${sanitation_type} have separate areas for men and women?						${sanitation_type}!='1'		yes
select_one yesno	sanitation_share	63. Do you share ${sanitation_type} with other households?								yes
end group	Sanitation_1
begin group	sharing							${sanitation_share}='2'
integer	hh_share_sanit	63. b) How many households share the ${sanitation_type}?								yes
end group	sharing
begin group	improved_san
begin group	Sanitation_2				field-list			${sanitation_2_skip} ='7' or ${sanitation_2_skip} ='8' or ${sanitation_2_skip} ='9' or ${sanitation_2_skip} ='10' or ${sanitation_2_skip} ='99'
select_multiple builders	sanit_install	64. Who installed the ${sanitation_type}?								yes
integer	sanit_age	65. How old is the ${sanitation_type}? (Number of YEARS)								yes
select_multiple watercost	sanit_cost	66. How does your household pay to use the ${sanitation_type}?								yes
select_multiple waterbodies	sanit_outflow	67. Where does the waste from ${sanitation_type} go?								yes
select_multiple personnel	sanit_who_maintain	68. Who maintains the ${sanitation_type}?								yes
select_one yesno	sludge_remove	69. Is waste (faecal sludge) ever removed from the ${sanitation_type}?								yes
end group	Sanitation_2
text	sanit_install_other	64. b) Please specify "other" for who installed the sanitation facility:						selected(${sanit_install},'95')
text	sanit_outflow_other	67. b) Please specify "other" location for outflow of your sanitation facility:						selected(${sanit_outflow},'95')
text	sanit_who_maintain_other	68. b) Please specify "other", fo maintenance of sanitation facility:						selected(${sanit_who_maintain},'95')
begin group	Sanitation_3							${sludge_remove}='2'
select_multiple personnel	sludge_manager	70. Who is in charge of removing the waste (faecal sludge) from the ${sanitation_type}?								yes
select_one yesno	sludge_manager_paid	71. Is this person paid?								yes
select_multiple sludgeuse	sludge_uses	What is the waste (faecal sludge) from the ${sanitation_type} used for?								yes
end group	Sanitation_3
end group	improved_san
begin group	Sanitation_4
select_multiple efficacy	sanit_appearance	72. How would you rate the appearance of the ${sanitation_type}?								yes
select_multiple efficacy	sanit_experience	73. How would you rate your experience with using the ${sanitation_type}?								yes
end group	Sanitation_4
end repeat	sanitation_groupA
begin group	Sanitation_5
select_one yesno	perceive_hrisk	74. Do you think people not using latrines/toilets are a health risk in your community?								yes
select_multiple reason_nouse	sanit_reason_nouse	75. Are there reasons why the community may not use latrines/toilets? (Record all that apply)								yes
end group	Sanitation_5
text	sanit_reason_nouse_other	75. b) Please specify "other" reason why some communty members may NOT use latrines/toilets:						selected(${sanit_reason_nouse},'95')
begin group	Sanitation_6							${sanit_reason_nouse}!='1'
select_one yesnounsure	sanit_unused	76. Within the last year, did your latrine/toilet ever become unusable?								yes
end group	Sanitation_6
begin group	sanit_unusable				field-list			${sanit_reason_nouse}!='1' and ${sanit_unused}='2'
select_multiple sanit_prob	sanit_why_unusable	76. b) Why was it unusable?								yes
note	sanit_time_nouse	How long was it unusable for?
integer	sanit_week_nouse	Weeks:
integer	sanit_month_nouse	Months:
integer	sanit_year_nouse	Years:
end group	sanit_unusable
text	sanit_why_unusable_other	76. c) Please specify "other" reason for why your latrine/toilet was unusable:						selected(${sanit_why_unusable},'95')
begin group	sanit_preference
select_one yesno	prefer_diff_sanit	77. Are you interested in sanitation facilites different from what you already have?								yes
end group	sanit_preference
begin group	sanit_nowant							${prefer_diff_sanit}='1'
select_multiple reason_nowant	sanit_reason_nowant	78. Why do you NOT want to have a latrine/toilet?								yes
end group	sanit_nowant
begin group	sanit_want				field-list			${prefer_diff_sanit}='2'
select_multiple reason_want	sanit_reason_want	79. Why do you want to have a latrine/toilet?								yes
select_one latrine_type	sanit_type_wanted	80. What type of sanitation facility/practice would you prefer to use?								yes
select_multiple reason_nowant	sanit_reason_nohave	81. What is your reason for not having a latrine/toilet?								yes
end group	sanit_want
text	sanit_reason_want_other	79. b) Please specify "other" reason for wanting a latrine/toilet?						selected(${sanit_reason_want},'95')
text	sanit_reason_nohave_other	81. b) Please specify "other" reason for NOT having a latrine/toilet:						selected(${sanit_reason_nouse},'95')
begin group	open_def							${sanitation_option}!='1' or ${sanitation_option}!='7' or ${sanitation_option}!='8'
select_one yesnounsure	OD_areas	82. Are there specific areas where people are not allowed to defecate?								yes
begin group	open_def_areas							${OD_areas}='2'
text	area_no_OD	82. b) Where are people not allowed to defecate in the open?								yes
select_multiple reason_OD_notallowed	reason_no_od	82. c) What is the reason for this rule? (record all that apply)								yes
end group	open_def_areas
text	reason_no_od_other	82. d) Please specify what is meant by other reason for no open defecation:						selected(${reason_no_od},'95')
end group	open_def
end group	Sanitation_survey
text	gps_coord	Please enter GPS coordinates:
integer	conduct	Please enter conductivity (mS):
text	Final_note	Final notes from enumerator (if applicable):
end group	consented
note	endnote	THANK YOU FOR YOUR TIME. THIS SURVEY IS NOW COMPLETE.	Thank the participant for their time. REMEMBER TO SAVE THIS SURVEY FORM ON THE NEXT PAGE.

## Sheet: choices
list_name	name	label	image	filter
watersource	1	Rainwater (private)
watersource	2	Rainwater (shared)
watersource	3	Private well
watersource	4	Public well
watersource	5	Public standpipe (taps)
watersource	6	Bottled water
watersource	7	Natural spring
watersource	8	River/Stream
watersource	9	Lake
watersource	10	City water (piped to house)
watersource	11	Seawater
watersource	95	Other (specify)
latrinetype	10	Flush/pour to septic
latrinetype	9	Flush/pour to pit
latrinetype	8	Flush/pour to elsewhere
latrinetype	7	Flush/pour to unknown place
latrinetype	6	Ventilated improved pit latrine (VIP)
latrinetype	5	Pit latrine with slab
latrinetype	4	Pit latrine without slab/open pit latrine
latrinetype	3	Composting toilet
latrinetype	2	Hanging latrine
latrinetype	1	Bucket
latrinetype	95	Other (specify)
superfeatures	7	Walls
constructionhelp	3	Household member built it alone
constructionhelp	2	Household member built it with help from others
constructionhelp	1	Someone else built it
constructionhelp	0	Don’t know / unsure / no response
latrinenonuse	2	Yes, some people do not use the latrine
latrinenonuse	1	No, everyone uses the latrine
latrinenonuse	0	Don't know / unsure / no response
latrinenonusecat	8	Senior female (65+)
latrinenonusecat	7	Senior male (65+)
latrinenonusecat	6	Adult female (16-64)
latrinenonusecat	5	Adult male (16-64)
latrinenonusecat	4	Female child (6-15)
latrinenonusecat	3	Male child (6-15)
latrinenonusecat	2	Infant (0-5)
latrinenonusecat	1	Other (specify)
latrinenonusecat	99	Don't know / unsure / no response
hhdisability	2	Yes
hhdisability	1	No
hhdisability	99	Don't know / unsure / no response
hhcomposition	2	Family only
hhcomposition	1	Family and others
participation	2	Yes
participation	1	No
participation	0	Don't know / unsure / no response
yesno	2	Yes
yesno	1	No
photoconsenthouse	2	Yes
photoconsenthouse	1	No
pitempty	4	Cover it and build a new pit
pitempty	3	Household empties it
pitempty	2	Private enterprise empties it
pitempty	1	Government service empties it
pitempty	0	Don't know / unsure / no response
latrinepartreuse	4	Foot slab / platform for squatting
latrinepartreuse	3	Riser
latrinepartreuse	2	Superstructure (walls, roof etc.)
latrinepartreuse	1	Ventilation pipe
latrinepartreuse	0	Don't know / unsure / no response
sourcelocation	3	INSIDE your house
sourcelocation	2	Outside NEAR your house (LESS than 1 minute away)
sourcelocation	1	Outside AWAY from your house (MORE than 1 minute away)
hhdisabilitytype	7	Injury
hhdisabilitytype	6	Illness
hhdisabilitytype	5	Old age
hhdisabilitytype	4	Pregnancy
hhdisabilitytype	3	Mental disability
hhdisabilitytype	2	Physical disability
hhdisabilitytype	1	Other
hhdisabilitytype	99	Don't know / unsure / no response
communityid	15	Community ##
communityid	14	Community ##
communityid	13	Community ##
communityid	12	Community ##
communityid	11	Community ##
communityid	10	Community ##
communityid	9	Community ##
communityid	8	Community ##
communityid	7	Community ##
communityid	6	Community ##
communityid	5	Community ##
communityid	4	Community ##
communityid	3	Community ##
communityid	2	Community ##
communityid	1	Community ##
presentworking	3	NOT PRESENT
presentworking	2	Present and WORKING
presentworking	1	Present but NOT WORKING
watertransport	5	Trolley / wheelbarrow
watertransport	4	Container with lid
watertransport	3	Bucket
watertransport	2	Drinking bottle
watertransport	1	Other
nonusewhy	6	Restricted movement / mobility
nonusewhy	5	Age
nonusewhy	4	Pregnancy
nonusewhy	3	Menstruation
nonusewhy	2	Mental disability
nonusewhy	1	Other
nonusewhy	0	Don't know / unsure / no response
defecationinstead	9	Relatives latrine (in another house)
defecationinstead	8	Neighbours latrine (in another house)
defecationinstead	7	Public / community latrine
defecationinstead	6	Bushes / the ground on household land
defecationinstead	5	Bushes / the ground on other land
defecationinstead	4	River or creek
defecationinstead	3	Ocean
defecationinstead	2	Diaper / nappy
defecationinstead	1	Other (specify)
defecationinstead	0	Don't know / unsure / no response
latrinetypea	4	Button flush
latrinetypea	3	Pour flush
latrinetypea	2	Dry
latrinetypea	1	Composting
latrinetypeb	4	Septic
latrinetypeb	3	Drum / tank
latrinetypeb	2	Lined pit
latrinetypeb	1	Unlined pit
floodpit	5	Fills with mud and water
floodpit	4	Fills with mud only
floodpit	3	Fills with water only
floodpit	2	Nothing
floodpit	1	Other
floodpit	0	Don't know / unsure / no response
riser	2	Purchased
riser	1	Made
hhmembers	1	Adult woman
hhmembers	2	Adult man
hhmembers	3	Female child
hhmembers	4	Male child
hhmembers	5	Entire family
hhmembers	95	Other (specify)
watertreat	1	No treatment
watertreat	2	Boiling
watertreat	3	Alum
watertreat	4	Bleaching or chlorine
watertreat	5	Sand filter
watertreat	6	Clay filter
watertreat	7	Cloth
watertreat	8	Solar
watertreat	9	Reverse Osmosis
watertreat	10	Does not drink
watertreat	95	Other (specify)
waterstorage	1	No storage
waterstorage	2	Cooking pot
waterstorage	3	Plastic pot/bucket
waterstorage	4	Large storage tank
waterstorage	5	Rainwater tank
waterstorage	6	PET (plastic) bottles
waterstorage	7	Jerry cans
waterstorage	8	Waterman (5 Gallon container)
waterstorage	95	Other (specify)
watercost	1	Does not pay
watercost	2	Fixed amount per month
watercost	3	Price per volume (litres or gallons)
watercost	4	Both: pay per month and per litre
watercost	95	Other (specify)
watersafety	1	No risk
watersafety	2	Little risk
watersafety	3	Some risk
watersafety	4	Serious risk
watersafety	5	No water available
watersafety	99	Don't know / unsure / no response
wateruse	1	Drinking
wateruse	2	Cooking
wateruse	3	Bathing
wateruse	4	Washing hands
wateruse	5	Washing clothes
wateruse	6	Animals
wateruse	7	Farming/gardens
wateruse	95	Other (specify)
contamination	1	Human faeces
contamination	2	Animal faeces
contamination	3	Helminths (worms)
contamination	4	Salty taste
contamination	5	No
contamination	95	Other (specify)
contamination	99	Don't know / unsure / no response
waterreliable	1	Always available
waterreliable	2	Usually available
waterreliable	3	Sometimes available
waterreliable	4	Rarely available
waterreliable	5	Never available
waterreliable	99	Don't know / unsure / no response
months	1	January
months	2	February
months	3	March
months	4	April
months	5	May
months	6	June
months	7	July
months	8	August
months	9	September
months	10	October
months	11	November
months	12	December
emerg_source	1	Lake
emerg_source	2	river/stream
emerg_source	3	Public tap
emerg_source	4	Public well
emerg_source	5	Private well
emerg_source	6	Rainwater (shared)
emerg_source	7	Rainwater (private)
emerg_source	8	Natural spring
emerg_source	9	Bottled water
emerg_source	95	Other (specify)
protectsource	1	Do not collect rainwater until after the first big rain of the rainy season
protectsource	2	Apply water treatment, filtration or boiling prior to treatment
protectsource	3	Clean the inside of the storage container
protectsource	4	Keep the storage containers covered
protectsource	5	Install screens/cloth to keep animals and insects out
protectsource	6	Only use clean cups/buckets/ladeles to remove water
protectsource	95	Other (specify)
rwh_runout	1	January
rwh_runout	2	February
rwh_runout	3	March
rwh_runout	4	April
rwh_runout	5	May
rwh_runout	6	June
rwh_runout	7	July
rwh_runout	8	August
rwh_runout	9	September
rwh_runout	10	October
rwh_runout	11	November
rwh_runout	12	December
rwh_runout	0	Never runs out
rwh_runout	99	Don't store rainwater
access_method	1	Electric pump
access_method	2	Hand pump
access_method	3	Rope and bucket
usagetype	1	Used at source
usagetype	2	Used at the home
usagetype	3	Used at both source and the home
usagetype	4	Not used
roof_type	1	Metal
roof_type	2	Plastic
roof_type	3	Ceramic/clay
roof_type	4	Thatch
roof_type	95	Other (specify)
taps_source	1	Lake
taps_source	2	River/stream
taps_source	3	Natural spring
taps_source	4	Rainwater (private)
taps_source	5	Groundwater
taps_source	95	Other (specify)
percent_comm	1	All 100%
percent_comm	2	Between 75% and 99%
percent_comm	3	Between 50% and 74%
percent_comm	4	Between 25% and 49%
percent_comm	5	Less than 25%
prevent_RO	1	No access
prevent_RO	2	Too far away
prevent_RO	3	Too expensive
prevent_RO	4	Don't like the taste
prevent_RO	5	They still have water from other sources
prevent_RO	95	Other (specify)
reasonfor_RO	1	Flooding
reasonfor_RO	2	Drought
reasonfor_RO	3	Cyclones
reasonfor_RO	4	Dry season
reasonfor_RO	5	Rainwater tanks are dry
reasonfor_RO	6	Don't know
reasonfor_RO	95	Other (specify)
yesnounsure	2	Yes
yesnounsure	1	No
yesnounsure	99	Don't know
drinkable_well_RO	1	It is drinkable, but a little salty and RO improves the taste
drinkable_well_RO	2	It is drinkable but unsafe, and RO water is safer
drinkable_well_RO	3	RO water is closer to home and more convenient
drinkable_well_RO	4	RO water is more popular/fashionable
drinkable_well_RO	95	Other (specify)
no_drink	1	Too salty
no_drink	2	Not safe
no_drink	95	Other (specify)
ROoverRWH	1	RO treated water tastes better
ROoverRWH	2	RO treated water is safer to drink
ROoverRWH	3	RO treated water is closer to home and more convenient
ROoverRWH	4	To save rainwater for times of water scarcity
ROoverRWH	95	Other (specify)
circumstance	1	Flooding
circumstance	2	Drought
circumstance	3	Cyclones
circumstance	4	Dry season
circumstance	5	Normal conditions
circumstance	6	When rainwater tanks are dry
circumstance	7	Don't know
circumstance	95	Other (specify)
flooding_type	1	Heavy rainfal and inland flooding
flooding_type	2	Coastal storm surge
flooding_type	3	Both
volume_unit	1	Litres
volume_unit	2	Gallons
rostorage	1	No storage
rostorage	2	Cooking pot
rostorage	3	Plastic pot
rostorage	4	Large storage tank
rostorage	5	Rainwater tank
rostorage	6	PET (plastic) bottles
rostorage	7	Jerry cans
rostorage	8	Waterman (5 Gallon container)
rostorage	95	Other (specify)
reasonfor_RO_now	1	Flooding
reasonfor_RO_now	2	Drought
reasonfor_RO_now	3	Cyclones
reasonfor_RO_now	4	Dry season
reasonfor_RO_now	5	Rainwater tanks are dry
reasonfor_RO_now	6	Normal conditions
reasonfor_RO_now	7	Don't know
reasonfor_RO_now	8	Not used
reasonfor_RO_now	95	Other (specify)
latrine_type	1	Bucket
latrine_type	2	Hanging latrine
latrine_type	3	Pit latrine
latrine_type	4	Ventilated improved pit latrine (VIP)
latrine_type	5	Composting toilet
latrine_type	6	Pour-flush toilet
latrine_type	7	Flush toilet
latrine_type	95	Other (specify)
waterbodies	1	Piped sewer
waterbodies	2	Septic tank
waterbodies	3	Pit latrine
waterbodies	4	Garbage
waterbodies	5	Ocean
waterbodies	6	River/Stream
waterbodies	95	Other (specify)
waterbodies	99	Don't know
personnel	1	Local man
personnel	2	Local woman
personnel	3	Entire community
personnel	4	People hired from outside the community
personnel	5	Household members (owners)
personnel	6	Nobody
personnel	99	Don't know
sludgeuse	1	Not used
sludgeuse	2	Cooking fuel
sludgeuse	3	Fertilizer
sludgeuse	4	Feed fish farm
sludgeuse	5	Feed pigs
sludgeuse	95	Other (specify)
sludgeuse	99	Don't know
reason_nouse	1	No facility exists
reason_nouse	2	Gender issues
reason_nouse	3	Smell
reason_nouse	4	Black magic/superstition
reason_nouse	5	Preference for traditional practice
reason_nouse	6	Distance from home
reason_nouse	7	Safety
reason_nouse	8	Embarassment/shame
reason_nouse	9	Culturally unnacceptable
reason_nouse	10	Too expensive
reason_nouse	95	Other (specify)
reason_nouse	99	Don't know
sanit_prob	1	Roof, wall or door problems
sanit_prob	2	Slab problems
sanit_prob	3	Pit overflow OR flooding
sanit_prob	4	No water in tank
sanit_prob	5	Flushing mechanism not working
sanit_prob	6	Bowl overflow / pipes clogged
sanit_prob	7	Pipe problems
sanit_prob	8	Safety concerns
sanit_prob	95	Other (specify)
sanit_prob	99	Don't know
reason_nowant	0	Already have a latrine/toilet
reason_nowant	1	Too expensive
reason_nowant	2	Materials not available
reason_nowant	3	Satisfied with current practice
reason_nowant	4	Does not see benefit in having a latrine
reason_nowant	5	Aesthetics (smell, appearance, etc)
reason_nowant	6	Environment (space, pollution, wrong soil-type, etc)
reason_nowant	7	Culturally unnacceptable
reason_nowant	95	Other (specify)
reason_want	1	Dignity, appearance or social status
reason_want	2	Health related reasons
reason_want	3	Time or distance spent walking to defecation site
reason_want	4	Increased safety
reason_want	5	Age (getting old)
reason_want	95	Other (specify)
reason_want	99	Don't know
reason_OD_notallowed	1	Keep community clean
reason_OD_notallowed	2	Prevent bad smell
reason_OD_notallowed	3	Protect drinking water sources
reason_OD_notallowed	4	Child safety
reason_OD_notallowed	5	Disease prevention
reason_OD_notallowed	95	Other (specify)
reason_OD_notallowed	99	Don't know
efficacy	1	Very bad
efficacy	2	Bad
efficacy	3	Somewhat good
efficacy	4	Good
efficacy	5	Very good
efficacy	99	Don't know
builders	1	Government ( eg. MWSC, RWASH, etc)
builders	2	NGO
builders	3	Household (owners)
builders	95	Other (specify)
builders	99	Don't know
defecationplace	1	Bucket
defecationplace	2	Bush
defecationplace	3	Field
defecationplace	4	River/Stream
defecationplace	5	Beach
defecationplace	6	Ocean
defecationplace	7	Hanging latrine
defecationplace	8	Pour-flush toilet
defecationplace	9	Pit latrine
defecationplace	10	Flush toilet
defecationplace	95	Other (specify)
emergencysource	1	Rainwater
emergencysource	2	Bottled water
emergencysource	3	Natural spring
emergencysource	4	Reverse Osmosis treated water
emergencysource	5	Neighbour's water
emergencysource	95	Other (specify)
RO_watersource	1	Rainwater (private)
RO_watersource	2	Rainwater (shared)
RO_watersource	3	Private well
RO_watersource	4	Public well
RO_watersource	5	Public taps
RO_watersource	6	Bottled water
RO_watersource	7	Natural spring
RO_watersource	8	River/Stream
RO_watersource	9	Lake
RO_watersource	10	Seawater
RO_watersource	95	Other (specify)
RO_watersource	99	Don't know

## Sheet: settings
form_title	form_id	version	public_key	submission_url	default_language
Multiple water source_survey	Multiple water source_survey	1602190930			english

## Sheet: help-survey
The survey worksheet
This worksheet specifies all of the groups, questions, and other fields in your survey form, each in its own row. Aside from overall settings and lists of multiple-choice options, everything about your survey form is specified in this worksheet. For more help, see the following help topic: How do I design my form?
type	name	label	label:languagename	hint	hint:languagename	default	appearance	constraint	constraint message	constraint message:languagename	relevance	disabled	required	required message	required message:languagename	read only	calculation	repeat_count	media:image	media:audio	media:video	media:image:languagename	media:audio:languagename	media:video:languagename	choice_filter	note	response_note	publishable
This column specifies the type of the field or group. It has to follow a pre-specified format, and Excel's conditional formatting has been used to auto-highlight rows that appear to have a valid type column -- so, if you are using Excel and your row is not automatically highlighted, re-check that you have entered the type properly. See below for an exhaustive list of brief examples.	This column specifies the name of the field or group. Field names must be unique, and they cannot include any spaces or punctuation. Example: age	For those field types that present a user interface, this column is where you put the primary text for the question or field. You can include line-breaks in your label text by pressing Alt+Enter on Windows or Control+Option+Enter on a Mac.	Any label:languagename column (e.g., label:tamil) may be added in order to provide labels in an alternative language.	Text in this column, if any, will appear italicized beneath the field's label. You can include line-breaks in your hint text by pressing Alt+Enter on Windows or Control+Option+Enter on a Mac.	Any hint:languagename column (e.g., hint:tamil) may be added in order to provide hints in an alternative language.	If you want to default the user's entry or selection for a given field, you can specify a number or some text in this column. Alternatively, you can specify an expression for dynamically calculating the field's default entry or selection, in the calculation column. See the following help topic for more details: How can I provide default entries or selections for users filling out my form?	For field types that allow multiple appearances, you can specify the appearance style in this column (e.g., quick or minimal for select_one fields). See the individual examples below.	Enter an expression into this column to validate entered or selected values. The user will only be allowed to proceed to the next question when the expression evaluates to true. Use the constraint builder to build new constraint expressions. (Also see the expression quick-reference following the examples below.) Example: . < 130	If the user tries to move forward but the constraint expression is false, a generic "That entry is invalid" message will appear; to override this message on a field-by-field basis, enter another message into this column.	Any constraint message:languagename column (e.g., constraint message:tamil) may be added in order to provide constraint messages in an alternative language.	Enter an expression into this column to control when a field or group displays to the user (i.e., to control when it is "relevant"). The field or group will only show up to users when the expression in this column evaluates to true; otherwise, it will remain hidden. Use the relevance builder to build new relevance expressions. (Also see the expression quick-reference following the examples below.…	Enter yes into this column to temporarily disable a field. (Rarely used.)	Enter yes into this column to require that users enter or select a value before continuing.	If the user tries to move forward without entering or selecting a value for a required field, a generic "Sorry, this response is required" message will appear; to override this message on a field-by-field basis, enter another message into this column.	Any required message:languagename column (e.g., required message:tamil) may be added in order to provide required messages in an alternative language.	Enter yes into this column to make it read-only (a user can see the field, but cannot enter or select a value). (Rarely used, because note fields, which are by nature read-only, are automatically read-only regardless of what is specified here.)	This column specifies the expression to use for a calculate field, or the expression to use for calculating the default entry or selection for a visible form field. Use the calculation builder to build new calculation expressions. (Also see the expression quick-reference following the examples below.)	For a begin repeat row, this column can specify the number of times to repeat the group of questions. (Can be a fixed count like 3 or a reference to an earlier field like ${numhh_members}.)	To include an image to display for a field (in addition to or in lieu of its label), its filename should be specified here (and the file should be uploaded with this form defintion). Which media file formats are supported will depend on your Android device, but all devices support common image formats like .jpg or .png. Example: paddy.png	To include a sound clip that can be played at a field, its filename should be specified here (and the file should be uploaded with this form defintion). Which media file formats are supported will depend on your Android device. Example: explanation.3gpp	To include a video clip that can be played at a field, its filename should be specified here (and the file should be uploaded with this form defintion). Which media file formats are supported will depend on your Android device. Example: demonstration.mp4	Any media:image:languagename column (e.g., media:image:tamil) may be added in order to provide images for an alternative language.	Any media:audio:languagename column (e.g., media:audio:tamil) may be added in order to provide audio clips for an alternative language.	Any media:video:languagename column (e.g., media:video:tamil) may be added in order to provide video clips for an alternative language.	When filtering lists of multiple-choice options, this column specifies, for each field, which prior field should be used when filtering the list of options. For more details, see the following help topic: How can I filter the list of multiple-choice options presented to users? Example: filter=${survey_region}	This column can specify an optional note to appear with the field in printable versions of the survey form, in order to explain when groups or fields will appear (i.e., when they are relevant), what restrictions there are on user entries (i.e., what constraints apply), etc.	This column can specify optional text or symbols to appear in the response area to the right of questions in printable versions of the survey form. For a text field, for example, you might put something like |___|___| if you are looking for two letters or numbers; or, for a checkbox, you might put a hollow square like □ (this is a special HTML character: enter "&#9633;", without quotes, into this…	Enter yes into this column to indicate that a field in an encrypted form should be left unencrypted so that it can be published to one or more datasets. Use only for non-sensitive fields that can be left unencrypted without compromising data security. (This field is ignored for unencrypted forms.)
Examples (scroll right for appearance styles)
text	fieldname	Standard text field:
text	fieldname	Text field which uses the numeric keypad:					numbers
integer	fieldname	Standard integer field:
decimal	fieldname	Standard decimal field:
select_one listname	fieldname	Standard multiple-choice field (allows one selection, shown as series of radio buttons):
select_one listname	fieldname	Multiple-choice field (allows one selection, auto-advances to next question as soon as an option is selected):					quick
select_one listname	fieldname	Multiple-choice field (allows one selection, shown as a drop-down selector):					minimal
select_one listname	fieldname	Multiple-choice field (allows one selection, shown as a compact table of options):					compact
select_one listname	fieldname	Multiple-choice field (allows one selection, shown as a compact table of options with exactly three columns):					compact-3
select_one listname	fieldname	Multiple-choice field (allows one selection, shown as a compact table of options, auto-advances to next question as soon as an option is selected):					quickcompact
select_one listname	fieldname	Multiple-choice field (allows one selection, shown as a compact table of options with exactly three columns, auto-advances to next question as soon as an option is selected):					quickcompact-3
select_one listname	fieldname	Multiple-choice field (allows one selection, loads options from pre-loaded .csv file, includes options based on a "contains" comparison):					search('hhplotdata', 'contains', 'respondentname', ${nametofind})
select_one listname	fieldname	Multiple-choice field (allows one selection, loads options from pre-loaded .csv file, includes options based on a "starts with" comparison):					search('hhplotdata', 'startswith', 'respondentname', ${nameprefix})
select_one listname	fieldname	Multiple-choice field (allows one selection, loads options from pre-loaded .csv file, includes options based on an "ends with" comparison):					search('hhplotdata', 'endswith', 'respondentname', ${namesuffix})
select_one listname	fieldname	Multiple-choice field (allows one selection, loads options from pre-loaded .csv file, includes options based on an "exact match" comparison):					search('hhplotdata', 'matches', 'respondentname', ${nametofind})
select_one listname	fieldname	Multiple-choice field (allows one selection, loads options from pre-loaded .csv file, includes options based on both a "contains" comparison and an "exact match" filter):					search('hhplotdata', 'contains', 'respondentname', ${nametofind}, 'villageid', ${villageid})
select_multiple listname	fieldname	Standard multiple-choice field (allows multiple selections, shown as series of radio buttons):
select_multiple listname	fieldname	Multiple-choice field (allows multiple selections, shown as a pop-up selector):					minimal
select_multiple listname	fieldname	Multiple-choice field (allows multiple selections, shown as a compact table of options):					compact
select_multiple listname	fieldname	Multiple-choice field (allows multiple selections, shown as a compact table of options with exactly three columns):					compact-3
select_multiple listname	fieldname	Multiple-choice field (allows multiple selections, loads options from pre-loaded .csv file, includes options based on a "contains" comparison):					search('hhplotdata', 'contains', 'respondentname', ${nametofind})
select_multiple listname	fieldname	Multiple-choice field (allows multiple selections, loads options from pre-loaded .csv file, includes options based on a "starts with" comparison):					search('hhplotdata', 'startswith', 'respondentname', ${nameprefix})
select_multiple listname	fieldname	Multiple-choice field (allows multiple selections, loads options from pre-loaded .csv file, includes options based on an "ends with" comparison):					search('hhplotdata', 'endswith', 'respondentname', ${namesuffix})
select_multiple listname	fieldname	Multiple-choice field (allows multiple selections, loads options from pre-loaded .csv file, includes options based on an "exact match" comparison):					search('hhplotdata', 'matches', 'respondentname', ${nametofind})
select_multiple listname	fieldname	Multiple-choice field (allows multiple selections, loads options from pre-loaded .csv file, includes options based on both a "contains" comparison and an "exact match" filter):					search('hhplotdata', 'contains', 'respondentname', ${nametofind}, 'villageid', ${villageid})
geopoint	fieldname	Standard GPS location-capture field:
barcode	fieldname	Standard scan-barcode field:
date	fieldname	Standard date field:
date	fieldname	Date field (but for smaller screens):					no-calendar
datetime	fieldname	Standard date+time field:
datetime	fieldname	Date+time field (but for smaller screens):					no-calendar
image	fieldname	Standard image-capture field:
image	fieldname	Image-capture field which allows user to annotate image:					annotate
image	fieldname	Image-capture field which allows user to draw image:					draw
image	fieldname	Image-capture field which collects a signature as the image:					signature
audio	fieldname	Standard audio-capture field:
video	fieldname	Standard video-capture field:
note	fieldname	Standard note field (read-only).
start	fieldname
end	fieldname
deviceid	fieldname
subscriberid	fieldname
simserial	fieldname
phonenumber	fieldname
comments	fieldname
calculate	fieldname																(${age1}+${age2}+${age3}) div 3
calculate_here	fieldname																once(format-date-time(now(), '%Y-%b-%e %H:%M:%S'))
text audit	fieldname						p=50
audio audit	fieldname						p=50;s=0;d=60
audio audit	fieldname						p=50;s=0-600;d=60
audio audit	fieldname						p=50;s=firstfield;d=lastfield
begin group	groupname	Standard group
…
end group	groupname
begin repeat	repeatname	Standard repeated group
…
end repeat	repeatname
begin repeat	repeatname	Group repeated exactly three times																3
…
end repeat	repeatname
Quick reference for relevance, constraint, and calculation expressions
Operation	Operator	Example	Example answer
Addition	+	1 + 1	2
Subtraction	-	3 - 2	1
Multiplication	*	3 * 2	6
Division	div	10 div 2	5
Modulus	mod	9 mod 2	1
Equal	=	${fieldname} = 3	true or false
Not equal	!=	${fieldname} != 3	true or false
Greater-than	>	${fieldname} > 3	true or false
>-or-equal	>=	${fieldname} >= 3	true or false
Less-than	<	${fieldname} < 3	true or false
<-or-equal	<=	${fieldname} <= 3	true or false
Or	or	${fieldname} = 3 or ${fieldname} = 4	true or false
And	and	${fieldname} > 3 and ${fieldname} < 5	true or false
Not	not()	not(${fieldname} > 3 and ${fieldname} < 5)	false or true
	Function	Example
	once(expression)	once(random())
	once(random())	once(random())
	pulldata(csvname, colname, lookupcolname, lookupval)	pulldata('hhplotdata', 'plot1size', 'hhid_key', ${hhid})
	string-length(field)	string-length(.) > 3
	count-selected(field)	count-selected(.) >= 1
	selected(field, value)	selected(${fieldname}, 'Male')
	selected-at(field, number)	selected-at(${fieldname}, 0) = 'Shona'
	jr:choice-name(value, 'field')	jr:choice-name(selected-at(${selectmultfield}, 0), '${selectmultfield}')
	concat(fieldorstring, fieldorstring, ...)	concat(${firstname}, ' ', ${lastname})
	position(..)	position(..)
	count(repeatgroup)	count(${repeatgroupname})
	sum(repeatedfield)	sum(${loan_size})
	join(string, repeatedfield)	join(' ,', ${hh_member_name})
	min(repeatedfield)	min(${hh_member_age})
	max(repeatedfield)	max(${hh_member_age})
	indexed-repeat(repeatedfield, repeatgroup, index)	indexed-repeat(${name}, ${names}, 1)
	substr(fieldorstring, startindex, endindex)	substr(${phone}, 0, 3)
	coalesce(field1, field2)	coalesce(${id}, ${id2})
	round(field, digits)	round(${interest_rate}, 2)
	regex(field, expression)	regex(., '[A-Za-z0-9._%+-]+@[A-Za-z0-9.-]+.[A-Za-z]{2,4}')
	if(expression, valueiftrue, valueiffalse)	if(selected(${country}, 'South Africa') or selected(${country}, 'Zimbabwe'), 'SADC', 'Non-SADC')
	number(field)	number('34.8') = 34.8
	int(field)	int('39') = 39
	string(field)	string(34.8) = '34.8'
	date(string)	${fieldname} > date('2013-01-31')
	date-time(string)	${fieldname} > date('2013-01-31 16:42:00')
	format-date-time(field, format)	format-date-time(${fieldname}, '%Y-%b-%e %H:%M:%S')
	today()	format-date-time(today(), '%Y-%b-%e')
	now()	once(format-date-time(now(), '%Y-%b-%e %H:%M:%S'))
	uuid()	uuid()
	version()	version()
	username()	username()

## Sheet: help-choices
The choices worksheet
This worksheet is for the configuration of option lists for your multiple-choice questions. For regular option lists, all possible options will be listed here, one option per row. For option lists that will be dynamically loaded from a pre-loaded .csv file, there will be a single row that indicates from which .csv columns to load the option values, labels, and images (see the following help topic…
list_name	name	label	label:languagename	image	image:languagename	filter
This column specifies the name of a multiple-choice question type (without any spaces or punctuation). A given list of options will involve multiple rows, each with the same list_name. Example: yesno	This column specifies the internal value stored for a given choice. (It should really be called "value" rather than "name".) Example: 1 If dynamically loading from a pre-loaded .csv file, this should instead be the .csv column name from which to load option values.	This column specifies the label to use for a given choice, in the form's default language. Example: Yes If dynamically loading from a pre-loaded .csv file, this should instead be the .csv column name -- or comma-separated list of column names -- from which to load option labels for the default language.	Any label:languagename column (e.g., label:tamil) may be added in order to provide labels in an alternative language.	To include an image to display for an option, its filename should be specified here (and the file should be uploaded with this form defintion). Which media file formats are supported will depend on your Android device, but all devices support common image formats like .jpg or .png. Example: paddy.png If dynamically loading from a pre-loaded .csv file, this should instead be the .csv column name f…	Any label:languagename column (e.g., label:tamil) may be added in order to provide images in an alternative language.	To filter the list of options displayed, a filter value can be specified here, along with a filter expression in the choice_filter column of the survey worksheet. For example, you might have filter values like LAC and a choice_filter like filter=${survey_region}. For more details, see the following help topic: How can I filter the list of multiple-choice options presented to users?

## Sheet: help-settings
The settings worksheet
This worksheet contains overall settings for your form, all specified in the second row of the worksheet. When you download a form template from your SurveyCTO server, these settings will be pre-filled for you.
form_title	form_id	version	public_key	submission_url	default_language
This is the title of your form. If you begin this title with TEST - (as in "TEST - Household listing survey"), it will not appear by default to users (see the following help topic: How can I prevent forms from appearing until after I am finished testing them?).	This is the unique ID that will identify the form. While the form title can have spaces and can be changed from time to time, the form ID must not contain spaces and must remain fixed for the life of the form. The form ID must also begin with a letter, and it can only include letters, numbers, underscores, and hyphens (no other punctuation or special characters). Example: hhlisting_round1	This is the version number of the form, which you must increase each time you modify an existing form. If you started with a form template or with one of the sample forms, then this is automatic: the version is set to a formula that automatically increments every minute. (Otherwise, you need to increment the version number yourself, taking care to keep the number of digits fixed; the version has …	This is the public key with which to encrypt all form submissions. See the following help topic for details: How do I encrypt my data?	This is the submission URL to use when submitting encrypted forms. See the following help topic for details: How do I encrypt my data?	This is the name of the language associated with labels, images, and other content when no other language is specified. For example, the label:french column is clearly in French, but the label column, which will display by default, is in an unknown language. Put the name of that default language here. See the following help topic for details: How do I translate my form into multiple languages?
